# Supplementary material
Source: Royal Society of Chemistry journal article supplement (doi:10.1039/d6ee00064a)
Supplement: d6ee00064a3.pdf [file d6ee00064a3.pdf]

## Supporting Information

### Tailoring an Iron-Based Metal-Organic Framework for Zn-ORR/CER Battery

Sukhjot Kaur,<sup>a</sup> Safa Gaber,<sup>b</sup> Kalpana Garg,<sup>a</sup> Abdul Khayum Mohammed,<sup>b</sup> Ankur Bordoloi,<sup>c</sup> Harpriya Minhas,<sup>d</sup> Biswarup Pathak,<sup>d</sup> Dinesh Shetty\*<sup>b, d</sup> and Tharamani C. Nagaiah\*<sup>a</sup>

**Supplementary movie S1:** Electrochromic effect for Fe-Tp-10% G with time (shown with increased speed)

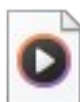

SM1.mp4

**Supplementary movie S2:** Electrochromic effect for Fe-Tp with time in the absence of continuous UV light i.e. outside the spectroelectrochemical setup (shown with increased speed)

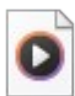

SM2.mp4
